# Supplementary material for: v-ATPase V0 subunit d2–deficient mice exhibit impaired osteoclast fusion and increased bone formation
Source: Springer Nature journal article supplement (doi:10.1038/nm1514), 2006-11-26
Supplement: nm1514-S8.pdf [file nm1514-S8.pdf]

## Supplementary Table

### (a) Structural Parameters measured by Microcomputed Tomography

|                | Mice | No. of mice | BV/TV (%)        | Tb.N. (N/mm)      | Tb.Th. ( $\mu\text{m}$ ) | Tb.Sp. ( $\mu\text{m}$ ) | Conn-Dens (1/mm <sup>3</sup> ) | Cortical thickness (mm) | Cortical Bone area (mm <sup>2</sup> ) |
|----------------|------|-------------|------------------|-------------------|--------------------------|--------------------------|--------------------------------|-------------------------|---------------------------------------|
| Femur          | WT   | 6           | 12.3 $\pm$ 0.62  | 5.24 $\pm$ 0.208  | 43 $\pm$ 0.11            | 192 $\pm$ 7.4            | 133 $\pm$ 21.9                 | 0.184 $\pm$ 0.009       | 0.74 $\pm$ 0.053                      |
|                | KO   | 6           | 18.4 $\pm$ 1.98* | 7.04 $\pm$ 0.371* | 43 $\pm$ 2.47            | 138 $\pm$ 9.5*           | 296 $\pm$ 44.5*                | 0.214 $\pm$ 0.010*      | 0.83 $\pm$ 0.056                      |
| Tibia          | WT   | 8           | 11.1 $\pm$ 1.17  | 5.99 $\pm$ 0.283  | 39 $\pm$ 1.06            | 167 $\pm$ 8.1            | 107 $\pm$ 23.0                 | 0.226 $\pm$ 0.005       | 0.59 $\pm$ 0.022                      |
|                | KO   | 8           | 19.9 $\pm$ 3.22* | 8.02 $\pm$ 0.371* | 41 $\pm$ 2.12            | 121 $\pm$ 7.1*           | 305 $\pm$ 45.6*                | 0.238 $\pm$ 0.007       | 0.63 $\pm$ 0.030                      |
| Vertebrae (L1) | WT   | 8           | 18.1 $\pm$ 1.13  | 5.54 $\pm$ 0.145  | 41 $\pm$ 0.71            | 179 $\pm$ 4.9            | 270 $\pm$ 17.3                 |                         |                                       |
|                | KO   | 8           | 34.0 $\pm$ 1.77* | 7.03 $\pm$ 0.187* | 52 $\pm$ 1.41*           | 135 $\pm$ 4.2*           | 345 $\pm$ 18.0*                |                         |                                       |

\*  $P < 0.05$  (Only the columns marked with \* show statistical differences)

### (b) Static histomorphometric parameters of bone structure in femur of wild-type (WT) and *Atp6v0d2*<sup>-/-</sup> (KO) mice.

|    | No. of mice | BV/TV (%)                    | Obs/BS (%)       | OcS/BS (%)                   | NOc/BPm (N/mm <sup>2</sup> ) | Tb.Th. ( $\mu\text{m}$ ) | Tb.Sp. ( $\mu\text{m}$ ) | Tb.N. (N/mm)     |
|----|-------------|------------------------------|------------------|------------------------------|------------------------------|--------------------------|--------------------------|------------------|
| WT | 4           | 9.84 $\pm$ 0.69              | 14.6 $\pm$ 1.52  | 10 $\pm$ 0.8                 | 4.1 $\pm$ 0.72               | 33.9 $\pm$ 3.0           | 247.5 $\pm$ 34.5         | 3.7 $\pm$ 0.42   |
| KO | 4           | 24.2 $\pm$ 1.37 <sup>†</sup> | 26.8 $\pm$ 3.15* | 4.55 $\pm$ 0.51 <sup>†</sup> | 3.15 $\pm$ 0.98              | 40.9 $\pm$ 5.23          | 133.4 $\pm$ 5.41*        | 5.22 $\pm$ 0.25* |

<sup>†</sup>  $P < 0.01$ , \*  $P < 0.05$  (Only the columns marked with \* or <sup>†</sup> show statistical differences)

### (c) Comparison of TRAP<sup>+</sup> osteoclasts (OCs) in femur of WT and *Atp6v0d2*<sup>-/-</sup> mice.

|    | No. of bone sections | Total No. of OCs per section | No. of multinucleated OCs per section | No. of mononuclear OCs per section | Average nuclei/OC           |
|----|----------------------|------------------------------|---------------------------------------|------------------------------------|-----------------------------|
| WT | 8                    | 41 $\pm$ 2.67                | 13.1 $\pm$ 1.77                       | 28 $\pm$ 1.63                      | 2 $\pm$ 0.06                |
| KO | 8                    | 40 $\pm$ 2.25                | 4.17 $\pm$ 1.29*                      | 35.9 $\pm$ 2.22 <sup>†</sup>       | 1.38 $\pm$ 0.1 <sup>‡</sup> |

\* $P < 0.0005$ , <sup>†</sup>  $P < 0.005$ , <sup>‡</sup>  $P < 0.0001$  (Only the columns marked with \*, <sup>†</sup> or <sup>‡</sup> show statistical differences).

Two representative sections of each mouse (4 mice from each genotype) were scored for the presence of TRAP<sup>+</sup> multinuclear (containing more than 3 nuclei) and mononuclear cells. All measurements were confined to the growth plate-metaphyseal junction of the distal femur.

### (d) Dynamic histomorphometric parameters of bone formation in femur of WT and *Atp6v0d2*<sup>-/-</sup> mice.

| Mice | No. of mice | BV/TV (%)                     | sLS/BS (%)       | dLS/BS (%)        | IrLTh ( $\mu\text{m}$ ) | MS/BS (%)        | MAR ( $\mu\text{m}/\text{d}$ ) | BFR/BS ( $\mu\text{m}^3/\mu\text{m}^2/\text{d}$ ) |
|------|-------------|-------------------------------|------------------|-------------------|-------------------------|------------------|--------------------------------|---------------------------------------------------|
| WT   | 5           | 8.92 $\pm$ 0.45               | 26.02 $\pm$ 1.53 | 6.17 $\pm$ 1.47   | 9.52 $\pm$ 1.09         | 20.58 $\pm$ 1.78 | 1.36 $\pm$ 0.16                | 0.28 $\pm$ 0.05                                   |
| KO   | 4           | 25.53 $\pm$ 1.33 <sup>†</sup> | 25.50 $\pm$ 2.04 | 12.97 $\pm$ 1.71* | 15.51 $\pm$ 1.45*       | 25.72 $\pm$ 2.59 | 2.22 $\pm$ 0.21*               | 0.55 $\pm$ 0.04 <sup>†</sup>                      |

<sup>†</sup>  $P < 0.01$ , \*  $P < 0.05$  (Only the columns marked with \* or <sup>†</sup> show statistical differences)
